1           **The conical shape of DIM lipids promotes *Mycobacterium***  
2                           ***tuberculosis* infection of macrophages**

3  
4

5 Jacques Augenstein<sup>#,1,4</sup>, Evert Haanappel<sup>#,1</sup>, Guillaume Ferré<sup>1</sup>, George Czaplicki<sup>1</sup>,  
6 Franck Jolibois<sup>2</sup>, Nicolas Destainville<sup>3</sup>, Christophe Guilhot<sup>1</sup>, Alain Milon<sup>1,\*</sup>, Catherine  
7 Astarie-Dequeker<sup>1,\*</sup>, Matthieu Chavent<sup>1,\*</sup>

8  
9 #These authors contributed equally to this study

10

11       1- Institut de Pharmacologie et Biologie Structurale, IPBS, Université de Toulouse,  
12       CNRS, UPS, 205 route de Narbonne, 31400, Toulouse, France.

13       2- LPCNO, Université de Toulouse, INSA, CNRS, UPS, CNRS, 135 av. de  
14       Rangueil, F-31077 Toulouse, France.

15       3- Laboratoire de Physique Théorique, IRSAMC, Université de Toulouse, CNRS,  
16       UPS, Toulouse, France

17       4- Present address: CMNS-Cell Biology & Molecular Genetics, 2201 Microbiology  
18       Building College Park, MD 20742-4451, USA

19

20 \* Correspondence and requests for materials should be addressed to M.C. (email:  
21 [matthieu.chavent@ipbs.fr](mailto:matthieu.chavent@ipbs.fr) ), to C.A.-D. (email: [catherine.astarie-dequeker@ipbs.fr](mailto:catherine.astarie-dequeker@ipbs.fr) ),  
22 or to A.M. (email: [alain.milon@ipbs.fr](mailto:alain.milon@ipbs.fr) )

23

24 **Abstract**

25           Phthiocerol dimycocerosate (DIM) is a major virulence factor of the pathogen  
26 *Mycobacterium tuberculosis* (*Mtb*). While this lipid promotes the entry of *Mtb* into  
27 macrophages, which occurs via phagocytosis, its molecular mechanism of action is  
28 unknown. Here, we combined biophysical, cell biology, and modelling approaches to  
29 reveal the molecular mechanism of DIM action on macrophage membranes leading to  
30 the first step of *Mtb* infection. MALDI-TOF mass spectrometry showed that DIM  
31 molecules are transferred from the *Mtb* envelope to macrophage membranes during  
32 infection. Multi-scale molecular modeling and <sup>31</sup>P-NMR experiments revealed that DIM  
33 adopts a conical shape in membranes and aggregate in the stalks formed between  
34 two opposing lipid bilayers. Infection of macrophages pre-treated with lipids of various  
35 shapes uncovered a general role for conical lipids in promoting phagocytosis. Taken  
36 together, these results reveal how the molecular shape of a mycobacterial lipid can  
37 modulate the biological function of macrophages.

38

## 39 INTRODUCTION

40 Phthiocerol dimycocerosate (DIM/PDIM) are highly hydrophobic lipids  
41 containing two multiple-methyl-branched fatty acid chains (**Fig. 1-a**). These lipids are  
42 mostly found in the cell wall of pathogenic mycobacteria and are particularly abundant  
43 in *Mycobacterium tuberculosis* (*Mtb*)<sup>1</sup>, the causative agent of tuberculosis. They  
44 constitute one of the main *Mtb* virulence factors<sup>2</sup>. Indeed, *Mtb* strains lacking DIM are  
45 drastically attenuated<sup>3</sup> and are more likely to be killed by the early pulmonary innate  
46 immune response<sup>4</sup>, when the bacteria encounter macrophages. Recent work has  
47 revealed that DIM modulate macrophage metabolism<sup>5</sup> and immune functions<sup>6,7</sup>. In  
48 particular, DIM increase the ability of *Mtb* to infect macrophages by modulating  
49 phagocytosis<sup>8</sup>, a fundamental immune process involving membrane remodeling.  
50 However, how DIM intervene in these cellular processes remains poorly understood.

51 *Mtb* synthesizes a large variety of lipid virulence factors, most of which are  
52 amphipathic glycolipids. These glycolipids act through their saccharide domains as  
53 potential ligands for membrane receptors on macrophages to induce *Mtb* phagocytosis  
54 <sup>9</sup>. Lacking a saccharide moiety, DIM cannot engage in such interactions. In contrast,  
55 the molecular mechanism involving DIM may be related to a global effect on the  
56 physical properties of the host cell membrane, such as its fluidity and organization<sup>8</sup>.  
57 Modifying such properties can be a successful strategy for bacteria to modulate  
58 eukaryotic cell functions. Several types of pathogenic mycobacteria apply this strategy  
59 to influence the fate of their host cells. For example, *M. ulcerans* produces the lipid-  
60 like endotoxin mycolactone which interacts with host membranes and disturbs their  
61 lipid organization<sup>10</sup>. In addition, pathogenic mycobacteria use lipoarabinomannan to  
62 enter neutrophils and prevent phagolysosome formation<sup>11</sup>.

63 The biophysical properties of DIM in biological membranes not yet been  
64 characterized at the molecular level. In particular, it is unclear if such a complex and  
65 large lipid can be incorporated in a simple phospholipid bilayer, and what shape DIM  
66 must adopt in such a membrane. The shape of lipid molecules, determined by  
67 structural properties<sup>12</sup> like their head group size, acyl chain lengths and degrees of acyl  
68 chain unsaturation, can drastically affect the structure and organization of biological  
69 membranes<sup>13,14</sup>. Studying how the molecular shape of lipids may disorganize lipid  
70 bilayers and how this can be related to biological function is still a challenge<sup>15</sup>. It  
71 requires linking the structure of molecules and their biophysical actions at the  
72 nanoscale to macroscopic consequences on the cell functions. To achieve this for DIM,

73 we developed a multidisciplinary approach combining multiscale Molecular Dynamics  
74 (MD) simulations, solid-state NMR and cell biology experiments. This revealed how  
75 the molecular shape of DIM can affect macrophage membranes to promote  
76 phagocytosis.  
77

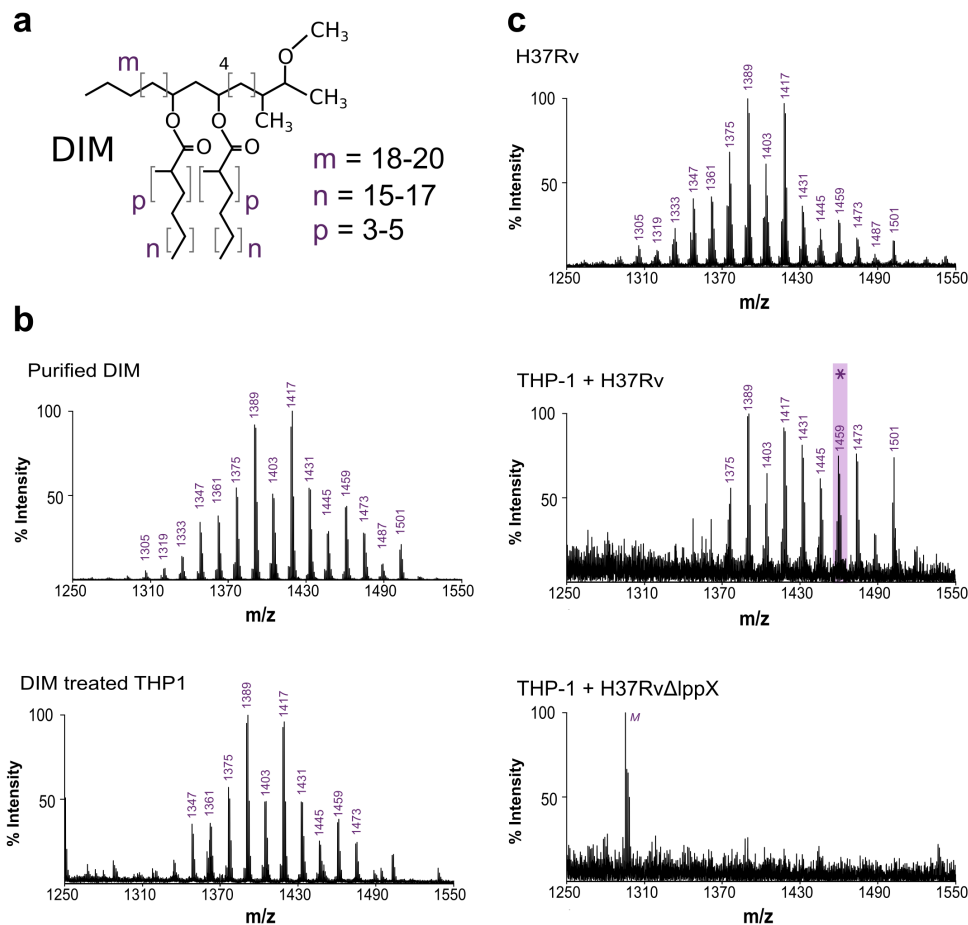

**Figure 1: DIM are transferred from the bacterial envelope to macrophage membranes.** (a) Structure of the DIM family of lipids, where m denotes the range of carbon atoms on the phthiocerol moiety, and n and p on the mycocerosate moieties. (b) MALDI-TOF mass spectra of purified DIM and of the membrane fraction of macrophages treated with DIM. (c) MALDI-TOF mass spectra of WT Mtb (HR37v) and of the membrane fraction of macrophages infected by H37Rv or by the H37RvΔlppX mutant. M: low intensity peak corresponding to the detection of the matrix molecule in the DIM region of interest. The star symbol highlights the mass of the DIM molecule chosen for the modelling, with m=18, n=17, and p=4.

78

## 79 RESULTS

80

### 81 DIM are transferred to host cell membranes during macrophage infection

82 First, we used MALDI-TOF mass spectrometry to assess whether DIM added  
83 to host cells is incorporated into their membranes. Human macrophage (THP-1) cells

84 were treated with purified DIM, and the mass spectrum of the extracted lipids was  
85 compared with the spectrum of purified DIM. The structure of DIM consists of a long  
86 chain of phthiocerol (3-methoxy, 4-methyl, 9,11-dihydroxy glycol) esterified with two  
87 mycocerosic acids (long-chain multiple-methyl-branched fatty acids) (**Fig. 1-a**). In  
88 agreement with the MycoMass database<sup>16</sup>, the purified DIM mass spectrum is  
89 characterized by a cluster of pseudomolecular ions  $[M + Na]^+$  between  $m/z = 1305$  and  
90  $m/z = 1501$ , in increments of  $m/z = 14$  (**Fig. 1-b**) reflecting the variability of chain  
91 lengths and methylations of the molecule. We observed that the spectrum of the  
92 extracted lipids from DIM-treated THP-1 cells showed a very similar series of peaks to  
93 that of purified DIM (**Fig. 1-b**). These peaks were absent in the spectrum of lipid  
94 extracts from untreated cells (**Fig. S1-a**). Hence, exogenously delivered DIM can be  
95 inserted into macrophage membranes and were detectable by MALDI-TOF mass  
96 spectrometry.

97 We next investigated if DIM could be transferred from the *Mtb* envelope to  
98 macrophage membranes during infection. To test this, we infected THP-1  
99 macrophages with the WT *Mtb* strain H37Rv for 2 h at a multiplicity of infection (MOI)  
100 of 15:1. At 40 h post-infection, the membrane fraction of the infected macrophages  
101 showed a mass spectrum similar to the lipid signature of DIM isolated from the H37Rv  
102 inoculum (**Fig. 1c**). We noticed a distinct shift towards longer DIM chain lengths  
103 consistent with the reported increase in molecular mass of DIM during *Mtb* infection<sup>17</sup>.  
104 The residual bacterial contamination of the macrophage membrane fractions was less  
105 than 1500 cfu, well below the threshold for detection of DIM extracted directly from  
106 bacteria (between  $10^5$  and  $10^7$  cfu, see **Fig. S1b**). Our data therefore strongly support  
107 the model that DIM is transferred from *Mtb* to the membranes of infected macrophages.

108 To verify whether DIM exposure at the surface of *Mtb* is required for their  
109 transfer to macrophage membranes, we infected macrophages with a mutant strain  
110 (H37Rv $\Delta$ lppX) lacking LppX, a lipoprotein required for the translocation of DIM to the  
111 outer membrane of *Mtb*<sup>18</sup>. After infection, we did not observe the typical mass spectrum  
112 of DIM in the membrane fraction of H37Rv $\Delta$ lppX-infected cells (**Fig. 1c**). We verified  
113 that the WT and mutant strains produced similar amounts of DIM (**Fig. S1b**).

114 Taken together, these results demonstrate that DIM molecules are indeed  
115 transferred to the membranes of macrophages during infection, provided they are  
116 exposed at the surface of *M. tuberculosis*.

117

## 118 DIM accommodate into a bilayer membrane by adopting a conical shape

119 Given their long aliphatic chains and their overall hydrophobic properties, we  
120 sought to understand how DIM might physically be accommodated in a bilayer  
121 membrane. We used a multi-scale modelling approach to gain insight into the  
122 conformation of such a complex lipid embedded in a simple phospholipid bilayer.

123 During macrophage infection, *Mtb* produces DIM of higher molecular weight  
124 than under non-infectious conditions<sup>17</sup> (**Fig. 1-c**). We therefore modelled the structure  
125 of a DIM molecule with a molecular mass of 1459 Da (star symbol in **Fig. 1-c**), *i.e.*  
126 having chain lengths and number of methylations corresponding to  $m=18$ ,  $n=17$ , and  
127  $p=4$  (**Fig. 1-a**). 800 ns of atomistic Molecular Dynamics (MD) simulations of a single  
128 DIM molecule in a 1-palmitoyl-2-oleoyl-*sn*-glycero-3-phosphocholine (POPC) lipid  
129 bilayer revealed that DIM is deeply embedded in the membrane and may transit  
130 between the two opposing leaflets (**Fig. 2-a**). DIM oxygen atoms preferentially  
131 remained in the proximity of the POPC ester bonds while the acyl chains stretched into  
132 the membrane hydrophobic core. The very long acyl chains (containing up to 27 carbon  
133 atoms) prevented confinement of the DIM molecule to one single leaflet. Instead, DIM  
134 seemed to be accommodated within the phospholipid bilayer by extending these  
135 chains in the inter-leaflets space (see density profile in **Fig. 2a**).

136 To further explore the dynamics of the DIM molecule within the membrane, we  
137 designed a Coarse-Grained (CG) model (**Fig. 2b**) based on the MARTINI force field  
138 (see Methods). This force field is well adapted to model a large variety of lipids and  
139 their actions on membranes and proteins<sup>19,20</sup>. CG modelling of a single DIM molecule  
140 in a POPC bilayer confirmed that DIM extended its long acyl chains in between the two  
141 leaflets as seen in the atomistic simulation (**Fig. 2b, c**). Using CG modelling we were  
142 able to extend the simulation to longer time scales to see multiple DIM translocations  
143 from one leaflet to the other (**Fig. 2c**). We then increased the number of DIM molecules  
144 up to a molar DIM-to-POPC ratio of about 7% (**Fig. S4**). At low concentrations (1%,  
145 2%, and ~4%), DIM molecules diffused freely inside the bilayer, while at 7% they  
146 started to strongly interact with each other and form aggregates in between the two  
147 leaflets. This behavior is also observed, both experimentally and computationally, for  
148 molecules with similar structural features, like triglycerides<sup>21,22</sup>.

149  
150  
151

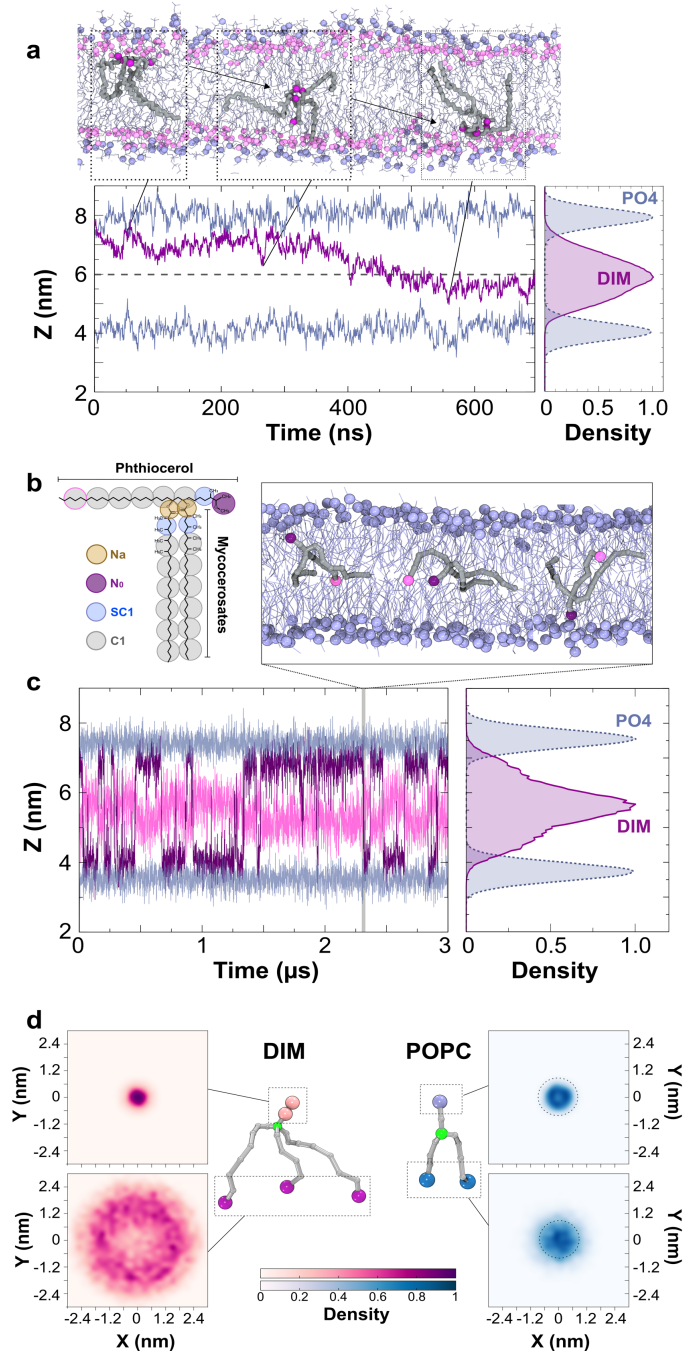

**Figure 2: Position and shape of a single DIM molecule in a POPC bilayer.** (a) upper inset: atomistic simulation of a DIM molecule (in gray licorice) showing its passage from one leaflet of the POPC bilayer to the opposite one. DIM oxygen atoms are represented in purple, POPC phosphorous atoms are displayed in light blue and POPC oxygen atoms in pink. Bottom left, in purple, evolution of the z-position for the center of mass of DIM's oxygen atoms during the course of the atomistic simulation. In light blue, averaged z-position of the phosphorous atoms of the POPC molecules. Bottom right, densities of the positions of the DIM lipid and POPC phosphate groups revealing the embedded DIM position in the bilayer. (b) Coarse-grained model of the DIM molecule (see Methods for details). (c) Evolution of N0 and the last C1 particles on the phthiocerol moieties (in purple and pink, respectively) during the course of the CG simulation. This plot shows a C1 particle confined around the interleaflet space while the N0 particle stayed in the proximity of the POPC oxygen atoms. Upper inset, DIM (in grey) transit from one leaflet to the other during CG simulation. Right inset, densities of the DIM lipid and POPC phosphate groups. (d) 2D density projections of each extremity for DIM and POPC molecules in the x-y membrane plane (CG simulation, see also Fig. S5 displaying densities for atomistic simulations) highlighting the conical (resp. cylindrical) shape of DIM (resp. POPC) lipid. Particles depicted in green were used for molecule centering.

153 We next sought to understand how the position of the DIM acyl chains in the  
154 inter-leaflet space affected its overall shape. To do so, we projected the positions of  
155 the lipid extremities onto the 2D membrane plane (**Fig. 2d**). When centering the  
156 molecule on the junction of the chains, this revealed very large movements of the three  
157 acyl chain extremities, while the most polar end of the phthiocerol chain remained  
158 largely static. For POPC, a similar projection displayed a completely different behavior,  
159 with comparable densities for both the headgroup and the hydrophobic acyl chain  
160 extremities (**Fig. 2d**). Comparable results were obtained from atomistic simulations  
161 (**Fig. S5**). These results can be related to the effective shape of each molecule: while  
162 it is known that POPC has a cylindrical shape, consistent with our simulations, which  
163 is suitable to form planar lipid membranes, our results indicated that DIM molecules  
164 adopt a strongly conical shape in a lipid bilayer.

165

### 166 **DIM drive the formation of non-bilayer membrane structures**

167 This conical molecular shape of DIM may have important consequences for the  
168 organization of DIM-containing membranes. Indeed, conical lipids are known to  
169 destabilize the lamellar membrane phase ( $L_{\alpha}$ ) and favor the appearance of a non-  
170 bilayer inverted-hexagonal phase ( $H_{II}$ )<sup>23</sup>. The transition from an  $L_{\alpha}$ -phase to an  $H_{II}$ -  
171 phase can be studied using <sup>31</sup>P-NMR spectroscopy by monitoring the NMR spectra at  
172 increasing temperature (see Methods). We have employed Magic Angle Spinning  
173 (MAS) NMR spectroscopy for enhanced sensitivity. A mixture of the phospholipids 1,2-  
174 dioleoyl-*sn*-glycero-3-phosphoethanolamine (DOPE) and 1-stearoyl-2-oleoyl-*sn*-  
175 glycero-3-phosphocholine (SOPC)<sup>24</sup> has been used for a range of lipids to study their  
176 propensity to induce non-bilayer phases<sup>25,26</sup>. To study the influence of DIM, we used  
177 lipid membranes made of a 3:1 (mol/mol) mixture of DOPE and SOPC (see Method).  
178 With this lipid composition, the membranes remained in the  $L_{\alpha}$  phase for temperatures  
179 up to 322 K (**Fig. 3a,c**). However, incorporating 5% of DIM into the lipid mixture  
180 destabilized the  $L_{\alpha}$  phase, and induced a transition from a  $L_{\alpha}$  phase at low temperature  
181 (284 K, **Fig. 3a**) to an  $H_{II}$  phase configuration at high temperature (310 K and 322 K,  
182 **Fig. 3a**) as evidenced by the <sup>31</sup>P NMR spectra. Thus, DIM destabilize the  $L_{\alpha}$  phase in  
183 our model membranes and promote the transition to the  $H_{II}$  phase.

184

185



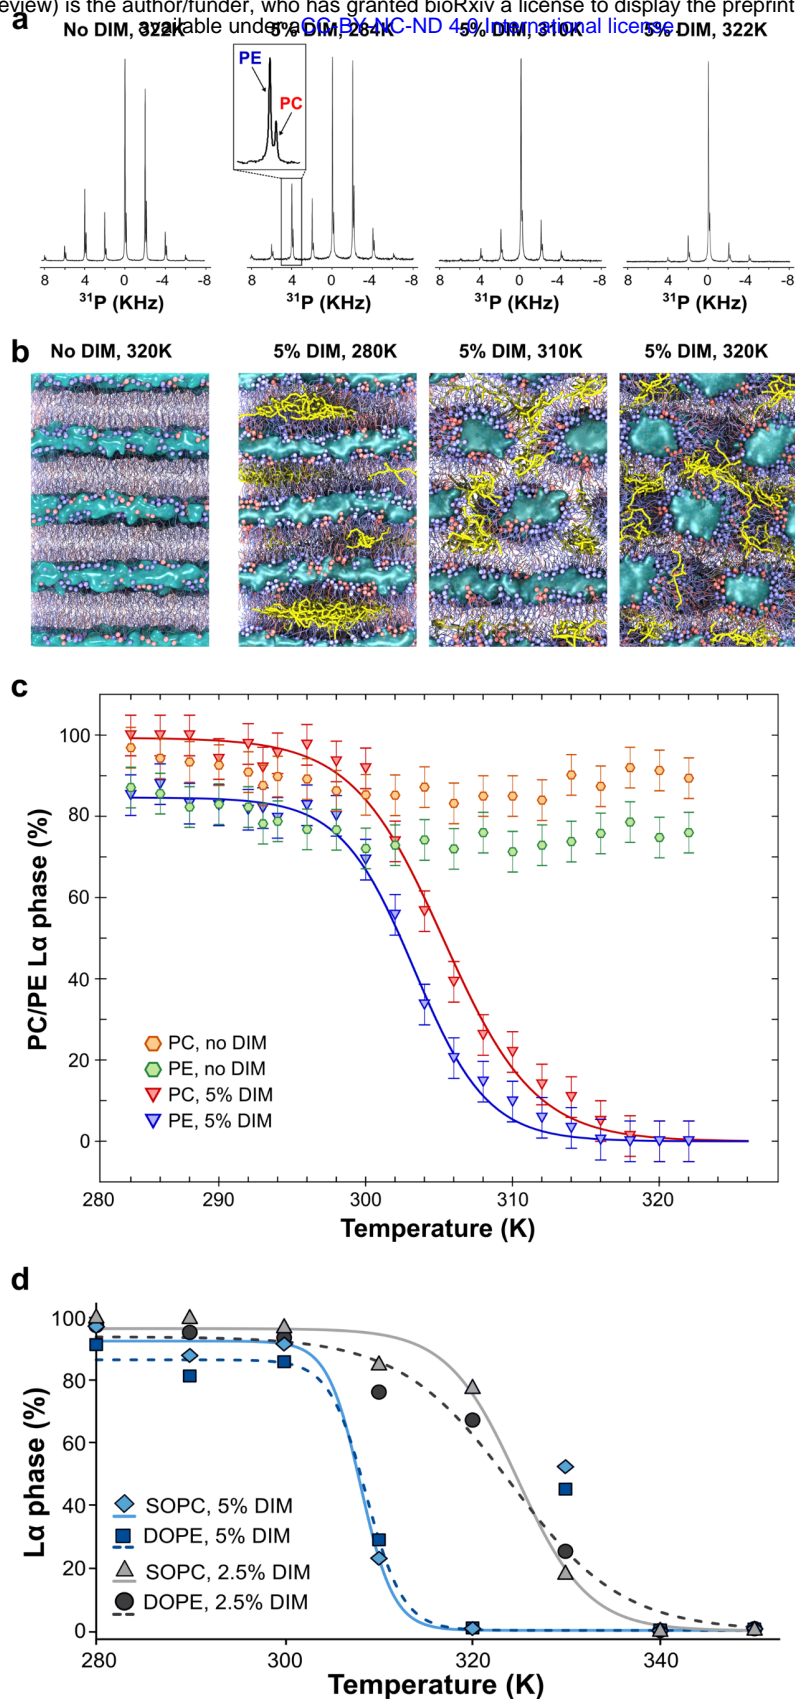

186

**Figure3: DIM induce HII phases.** (a)  $^{31}\text{P}$  NMR spectra at different temperatures for DOPE/SOPC (3:1, mol/mol) without DIM or containing 5% of DIM. In the MAS  $^{31}\text{P}$  NMR spectra, each spinning sideband consists of a DOPE and a SOPC peak. (b) Coarse grained models of the phase transition in DOPE/SOPC (3:1, mol/mol) without DIM or containing 5% of DIM. Increasing the temperature leads to the formation of tubular structures for the DIM-containing systems while the system without DIM stay fully lamellar. Snapshots shown are taken at the end of the 3  $\mu\text{s}$  simulations. SOPC molecules colored in red. DOPE molecules colored in blue. DIM molecules colored in yellow. Water molecules represented as a blue surface. (c) Spectral deconvolution of the  $^{31}\text{P}$  NMR spectra giving the percentage of the L $\alpha$  phase as a function of the temperature for DOPE/SOPC (3:1) without DIM (orange and green hexagons) and with addition of 5% DIM (red and blue triangles). In the case of 5% DIM, the phase transition can be approximated by a sigmoid (red and blue lines). (d) SOPC and DOPE phase transitions calculated from CG-MD simulations for 2.5% and 5% of DIM. For the DOPE /SOPC mixture with 5% of DIM, we removed the outlier values at 330K from the curve fitting based on statistical tests (see supplementary material).

187 As a complementary approach to monitor the ability of DIM to induce non-bilayer  
188 phases, we performed CG-MD simulations<sup>27</sup>. We modelled a stack of four lipid bilayers  
189 of identical composition (3:1 DOPE/SOPC) as in the <sup>31</sup>P-NMR experiments, for  
190 temperatures ranging from 280 K to 350 K (see Methods for details). Similar to the <sup>31</sup>P-  
191 NMR experiments, the membranes remained in the lamellar phase in the absence of  
192 DIM (**Fig. S6**), but a temperature-driven transition occurred when 5% of DIM were  
193 added (**Fig. 3b**). These simulations allow a deeper understanding of the molecular  
194 process of the H<sub>II</sub> phase transition in the presence of DIM. At low temperatures,  
195 molecules of DIM formed aggregates in the inter-leaflet space (**Fig. 3b**, 280K), as also  
196 seen in the POPC bilayer (**Fig. S4**). Increasing the temperature led to the formation of  
197 fusion stalks, hourglass-shaped lipid structures formed between neighboring bilayers.  
198 DIM aggregated in these stalks to extend their large hydrophobic tails (**Movie S1**). This  
199 aggregation stabilized and helped to increase the width of the stalks, eventually leading  
200 to the formation of tubular water-filled membrane structures (**Fig. 3b**, 310 K). At still  
201 higher temperatures (320 K and higher), DIM molecules diffused freely in the  
202 hydrophobic membrane core, thus stabilizing the H<sub>II</sub> configuration (**Fig. 3b**, 320 K and  
203 **Movie S1**).

204 We deconvoluted the <sup>31</sup>P-NMR spectra recorded between 282 K and 324 K in  
205 2 K steps for DOPE/SOPC (3:1) with 5% of DIM, using a set of parameters obtained  
206 from reference datasets (see Methods and **Table S2**). The <sup>31</sup>P chemical shifts of DOPE  
207 and SOPC are different. Therefore, each spinning sideband in our spectra consisted  
208 of two resolved peaks (**Fig. 3a**) enabling us, in a single spectrum, to independently  
209 analyze the percentages of the L<sub>α</sub> and H<sub>II</sub> phases for DOPE and for SOPC. For both  
210 lipids, we observed a continuous transition from the L<sub>α</sub> to the H<sub>II</sub> phase described by a  
211 sigmoid (**Fig. 3c**, Supplementary Material and **Table S3**). The phase transition  
212 midpoint temperatures (T<sub>50</sub>) were 303.5 K (± 0.4) for DOPE and 305.3 K (± 0.5) for  
213 SOPC. Thus, the DOPE lipids were more susceptible to transition to an H<sub>II</sub> phase than  
214 the SOPC lipids, a tendency observed in most of the tested conditions (**Table S3**). This  
215 result is in agreement with previous studies showing that conical DOPE prefers the H<sub>II</sub>  
216 phase, in contrast to cylindrical POPC lipids<sup>28</sup>. In the CG-MD simulations, we evaluated  
217 the percentage of L<sub>α</sub> phase as a function of temperature from the distribution of lipid  
218 tilt angles (see Supplementary material), for SOPC and DOPE (**Fig. 3d**). Here, too, we  
219 observed continuous phase transitions that were fitted by a sigmoid with a midpoint

220 transition temperature of ~308 K (**Table S3**), which is in broad agreement with the <sup>31</sup>P-  
221 NMR experiments.

222 CG-MD simulations revealed that the first stage of the mechanism through  
223 which DIM drive the L<sub>α</sub>-to-H<sub>II</sub> phase transition involves their aggregation in membrane  
224 stalks. Hence, blocking the formation of stalks would be expected to reduce the effect  
225 of DIM. To test this, and validate our hypothesis, we replaced a fraction of SOPC with  
226 lysophosphatidylcholine (lysoPC), a lipid known to hinder the formation of fusion  
227 stalks<sup>29,30</sup>. <sup>31</sup>P-NMR experiments on liposomes of DOPE/SOPC/lysoPC (75:25:0),  
228 (75:20:5), and (75:15:10), each containing 2.5% of DIM, revealed an increase of the  
229 transition midpoint temperature T<sub>50</sub> (**Fig. S8**) with increasing percentage of lysoPC,  
230 highlighting a diminished effect of DIM when fusion stalk formation is inhibited. We next  
231 performed CG-MD simulations to understand the molecular process involved.  
232 Consistent with the NMR experiment, including lysoPC in the simulation increased the  
233 value of T<sub>50</sub> (**Fig. S8a**). From these simulations, we observed that the effect of lysoPC  
234 did not involve a direct interaction with DIM, as lysoPC was spread throughout the  
235 membranes (**Fig. S8b**). Indeed, <sup>31</sup>P-NMR experiments on DOPE/SOPC (5:1, mol/mol),  
236 which displays an L<sub>α</sub>-to-H<sub>II</sub> transition without DIM, also showed an increase in T<sub>50</sub> upon  
237 replacing a fraction of SOPC by lysoPC (**Fig. S7**). Thus, limiting the formation of stalks  
238 decreased the ability of DIM to effectively drive the formation of non-bilayer membrane  
239 structures.

240 Altogether, the combination of <sup>31</sup>P-NMR and CG-MD simulations revealed the  
241 ability of DIM lipids to perturb membrane organization by promoting a phase transition  
242 from the lamellar to the inverted hexagonal phase. The molecular mechanism involves  
243 an initial aggregation of DIM lipids in fusion stalks, which then leads to a complete  
244 destabilization of the lamellar phase in favor of the inverted hexagonal phase.

245

### 246 **High potency of DIM to induce non-bilayer phase in comparison to other lipids**

247 We compared the ability (potency) of DIM to induce the H<sub>II</sub> phase to that of lipids  
248 with different structural features using <sup>31</sup>P-NMR. We first tested the effect of the  
249 concentration of DIM on the formation of the H<sub>II</sub> phase. Figure **4-b** shows that  
250 decreasing the DIM concentration to 2.5% and 1% still led to the formation of the full  
251 H<sub>II</sub> phase, albeit at a higher temperature. The increased transition midpoint  
252 temperature (**Fig. 4b**) reveals a dose-response relationship, which is also observed in  
253 CG-MD simulations (**Fig. 3d**). We then tested the effect of the triglyceride tripalmitin

254 (Fig. 4a), which, like DIM, has three acyl chains. However, incorporation of either 2.5%  
 255 or 5% of tripalmitin did not induce a full H<sub>II</sub> phase transition (Fig. 4b). Thus, the effect  
 256 of DIM on non-bilayer structure formation did not seem to be uniquely related to its  
 257 three-legged structure.  
 258

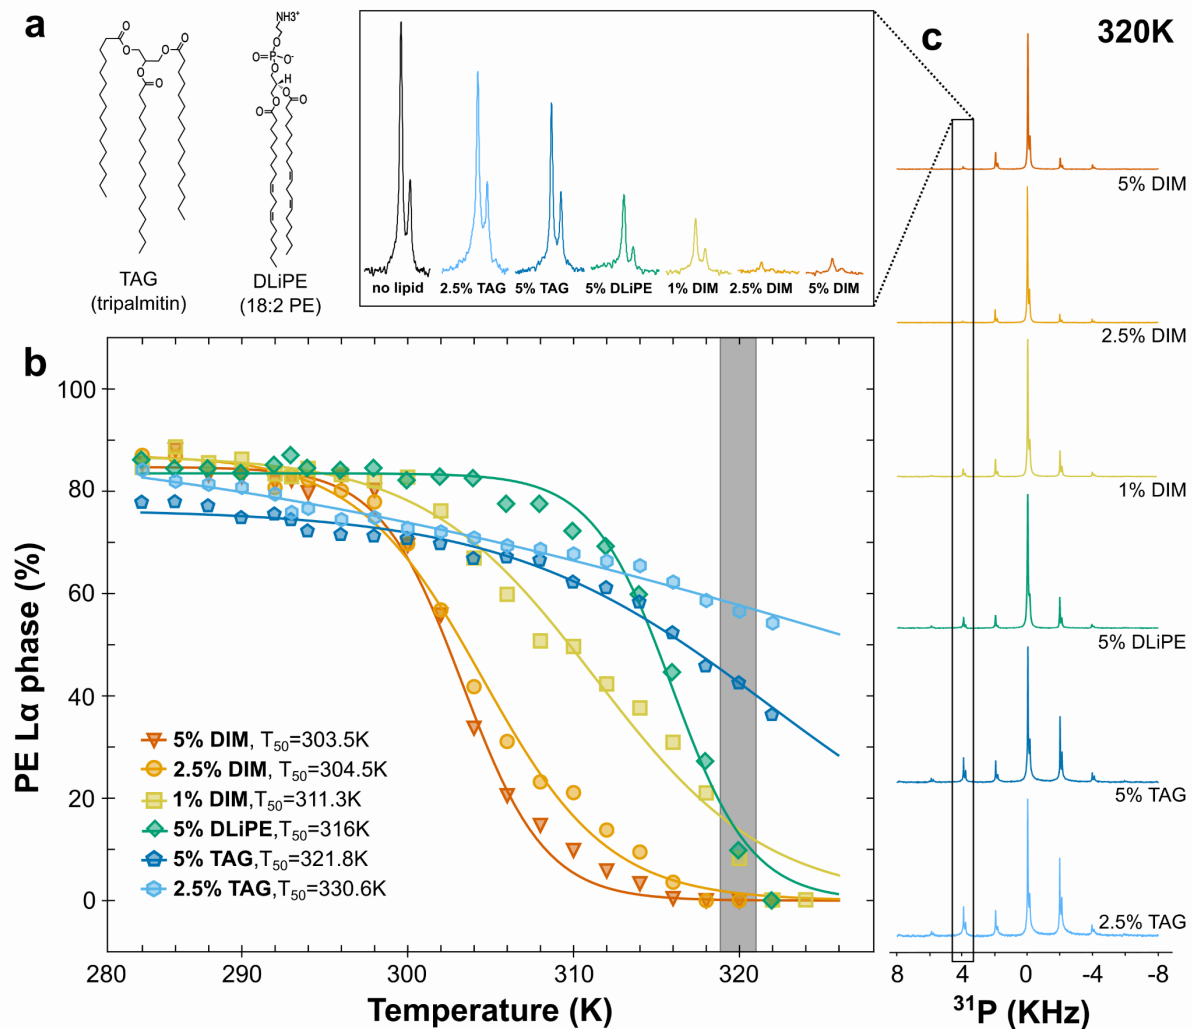

**Figure4: Comparison of DIM potency to induce non-bilayer phase with lipids of different shapes. (a)** Molecular structures of the triacylglycerol (TAG) tripalmitin and of 1,2-dilinoleoyl-*sn*-glycero-3-phosphoethanolamine (DLiPE). **(b)** Evolution of the L $\alpha$ -to-H<sub>II</sub> phase transition for the DOPE molecules as a function of temperature for DOPE/SOPC (3:1) containing different concentrations of DIM, DLiPE and TAG (see also Fig. S9 for the respective curves for SOPC molecules). For clarity, error bars are omitted. As seen in Fig. 3, the error was evaluated to  $\pm 5\%$ . The gray bar represents the points obtained from the spectra highlighted in c. **(c)**  $^{31}\text{P}$  NMR spectra for the lipid mixtures containing TAG, DLiPE or DIM at 320 K. The second rotation band (4 kHz), which is strongly related to the evolution of the L $\alpha$  phase, is magnified in the upper panel. For comparison, the black peak depicts the second rotation band of DOPE/SOPC (3:1) at 320 K.

259

260 We finally analyzed the ability of 1,2-dilinoleoyl-*sn*-glycero-3-  
 261 phosphoethanolamine (DLiPE) to induce the L $\alpha$ -to-H<sub>II</sub> phase transition and compared  
 262 it with DIM. With two double bonds in each acyl chain (Fig. 4a), DLiPE is expected to

263 be a strong enhancer of hexagonal phase formation<sup>31</sup>. With 5% of DLiPE, we observed  
264 a full H<sub>II</sub> phase transition already at 322K (**Fig. 4b,c**) and a transition midpoint  
265 temperature for DOPE of 316 K (± 0.4). However, this value is higher than for 5% DIM  
266 (303.5K ± 0.4), 2.5% DIM (304.5K ± 0.5) and even 1% DIM (311.3K ± 1.0) (**Table S3**).  
267 Thus, DIM molecules are strong inducers of non-bilayer phases, even at low  
268 concentrations.

269 Lipid shape can be assessed by studying inverted hexagonal phase in different  
270 lipid mixtures<sup>32</sup>. Here, using the L<sub>α</sub>-to-H<sub>II</sub> phase transition temperature as a measure  
271 to assess lipid conical shape, we ranked the shape of the different molecules: DIM  
272 were strongly conical, DLiPE were less conical, while the tripalmitin were the least  
273 conical.

274

### 275 **Lipid shape modulates the entry of *Mtb* and zymosan particles into macrophages**

276 In our previous experiments, the DIM-deficient mutant H37RvΔ*ppeE* appeared  
277 to infect macrophages with a lower efficiency than the WT strain. Coating these DIM-  
278 deficient mutant bacteria with DIM restored the WT phenotype while coating mutants  
279 with tripalmitin did not have an effect<sup>8</sup>. These results may now be related to their  
280 respective conical shapes: strongly conical for DIM and less conical for tripalmitin. To  
281 test whether it is specifically the conical shape of DIM that helps *Mtb* to invade  
282 macrophages, we evaluated the impact of exogenously added DIM and various other  
283 lipids on the capacity of this mutant to invade macrophages in comparison to the WT  
284 H37Rv strain (**Fig. 5a**). We confirmed that the DIM-deficient mutant infected a lower  
285 percentage of macrophages than the WT strain (**Fig. 5b,c**). Pre-treatment of  
286 macrophages with DIM restored the percentage of infected cells to a level comparable  
287 to that observed with the WT H37Rv strain in untreated macrophages (**Fig. 5b,c**).  
288 Notably, treating macrophages with the conical phospholipid POPE also enhanced the  
289 percentage of macrophages infected with the H37RvΔ*ppeE* mutant, whereas treatment  
290 with the cylindrical lipid POPC had no significant effect (**Fig. 5c**). These data support  
291 the hypothesis that the conical shape of DIM, which induces non-bilayer membrane  
292 structures, increases the efficiency of *Mtb* to infect macrophages.

293 To determine whether this effect of DIM on macrophages is restricted to  
294 infection by *Mtb*, we examined the effect of DIM and other lipids on the uptake of  
295 zymosan (**Fig. 5d**) a fungal polysaccharide frequently used to study non-opsonic

296 phagocytosis<sup>32</sup>. We found that macrophage pre-incubation with DIM also increased  
 297 zymosan uptake by macrophages in comparison to untreated conditions, as did pre-  
 298 incubation with POPE but not with POPC (Fig. 5e). These data indicate that DIM and  
 299 other conical lipids generally promote phagocytosis by macrophages.

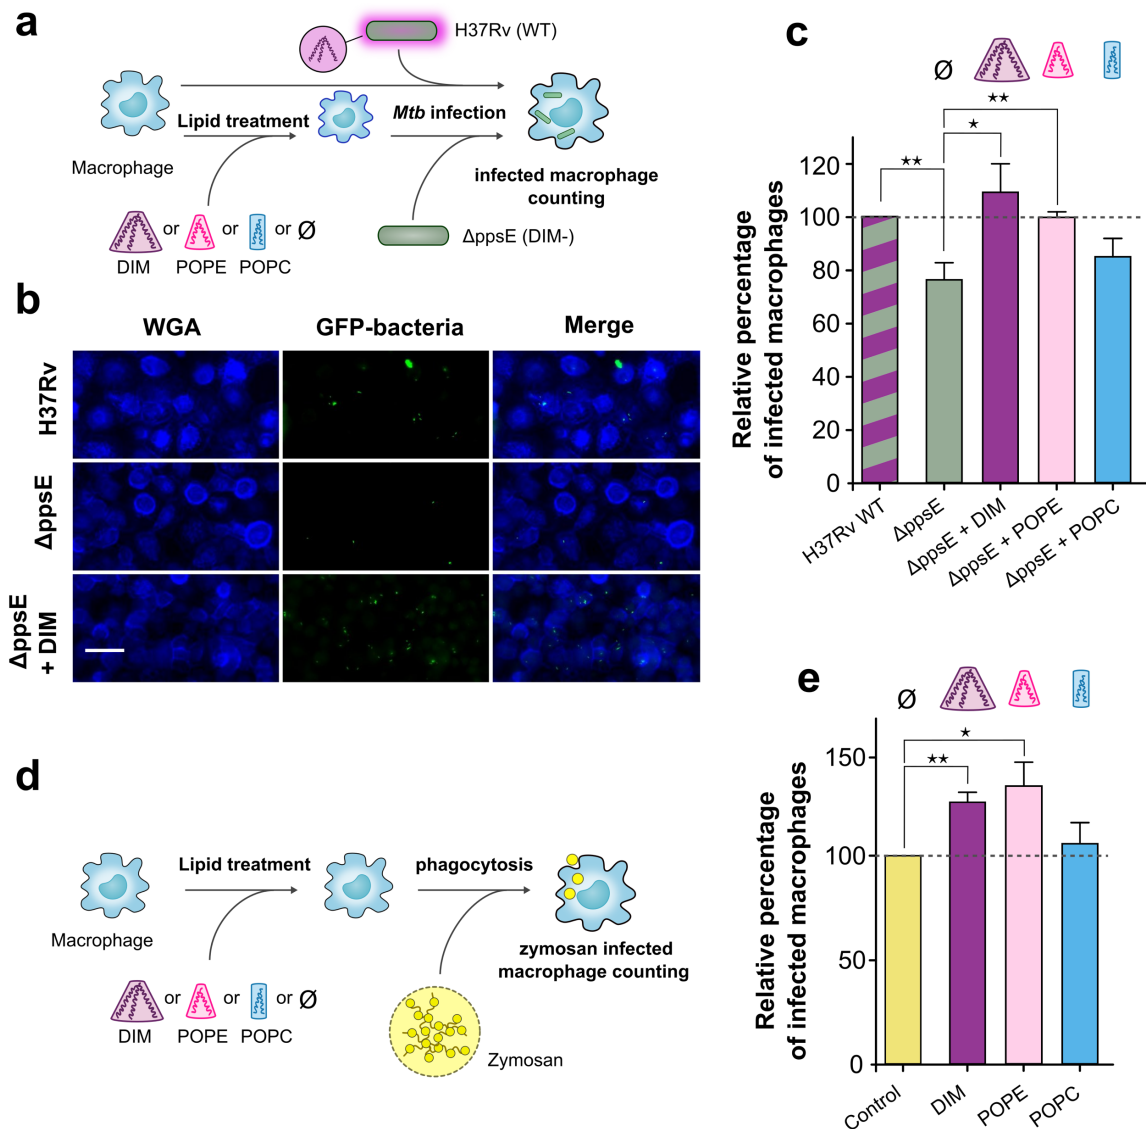

**Figure 5: Lipid shapes modulate the entry of the *Mtb*ΔppsE mutant and zymosan into macrophages.** (a) Macrophages were incubated at 37°C for 1 h with lipid solvent (∅) or 70 μM lipids (DIM, POPC and POPE) and subsequently exposed to GFP-expressing H37Rv WT or ΔppsE (MOI 10:1) for 1 h. Cells were then fixed and processed for the quantification of infected macrophages by fluorescence microscopy. (b) Representative fluorescence microscopy images of untreated or DIM-treated macrophages stained with WGA (membrane marker, blue) and infected with H37Rv WT or ΔppsE (green); scale bar: 30 μm. (c) The histogram represents the percentage of macrophages infected with ΔppsE in lipid-treated and untreated macrophages, expressed with respect to H37Rv WT (100%). (d) Macrophages were incubated with solvent (∅) or lipids, and then put in contact for 1 h with zymosan particles (MOI 30:1). (e) Percentages of macrophages infected with zymosan in untreated cells or cells treated with lipids. Values are expressed with respect to the uptake of zymosan in untreated cells (100%). The values are means + SEM of 8-10 separate experiments. The significance of difference in the percentage of macrophage infection between H37Rv WT and ΔppsE or between untreated and lipid-treated cells were evaluated, \*, p < 0.05; \*\*, p < 0.015.

## 300 DISCUSSION

301 While lipid transfer from *Mtb* to the macrophage membranes during infection  
302 had been demonstrated for glycolipids<sup>33</sup>, this was never shown for DIM. By using  
303 MALDI-TOF mass spectrometry, we established that DIM molecules exposed at the  
304 envelope of *Mtb* are indeed transferred to the macrophage membranes during infection  
305 (Fig. 1). We envision two mechanisms that could account for this process. DIM may  
306 be exchanged by direct contact between the surface of the bacteria and the  
307 macrophage membrane at contact sites. Such direct exchange of cholesterol and  
308 cholesterol-glycolipids has been observed between *Borrelia burgdorferi* and HeLa  
309 cells<sup>34</sup>. Alternatively, DIM could be transported in the membranes of extracellular  
310 vesicles, which are known to be excreted by *Mtb* and other mycobacteria<sup>35</sup>, followed  
311 by fusion of these vesicles with the plasma membrane of the macrophages. Lipid  
312 exchange mediated by vesicle fusion was shown for *Borrelia burgdorferi*<sup>34</sup> and for  
313 *Pseudomonas aeruginosa*<sup>36</sup>. For the latter process, lipid transfer could be favored by  
314 the conical shape, which promotes the fusion of vesicles with the host cell membrane<sup>37</sup>.  
315 Here, by combining <sup>31</sup>P-NMR with MD simulations, we demonstrated that DIM can  
316 adopt such a conical shape and promote the formation of non-bilayer (inverted  
317 hexagonal) membrane phases (Fig. 3), structures important for efficient membrane  
318 fusion<sup>38</sup>. Membrane fusion may also be important for sealing of the phagosomal  
319 membrane during the ultimate stage of phagocytosis. Notably, our results showed that  
320 even DLiPE, a strong enhancer of non-bilayer phases, did not match the strength of  
321 DIM in promoting non-bilayer structures (Fig. 4). This may be explained by the fact  
322 that DIM lipids preferentially aggregate in transient stalks (Fig. 3b and movie S1) to  
323 stabilize them, thereby enhancing non-bilayer phase formation. Based on our  
324 modelling, the conical shape of DIM can be related to the accommodation of the very  
325 long acyl-chains of DIM to phospholipid bilayers (Fig. 2). This shape may also be  
326 adopted by other long acyl chain lipids that are important for *Mtb* infection<sup>2</sup> and are  
327 transferred to the host cell membrane<sup>33</sup> such as trehalose mono- and di-mycolate and  
328 the phenolic glycolipids, molecules structurally related to DIM.

329 There is now ample evidence that lipids can modulate membrane protein  
330 function<sup>39,40</sup>. As seen for lipids such as diacylglycerol<sup>41</sup>, the conical shape of DIM may  
331 modulate membrane protein activity. Accordingly, we find that DIM increase the non-  
332 opsonic phagocytosis of zymosan, a process well known to be mediated by a repertoire  
333 of membrane receptors, including complement receptor 3 (CR3)<sup>32</sup> and the mannose

334 receptor<sup>42</sup>. DIM may act on membrane proteins via different biophysical mechanisms.  
335 First, DIM may impose curvature on the host membrane<sup>12</sup>, which in turn may modulate  
336 integral membrane protein sorting<sup>43,44</sup> and function<sup>45</sup>. DIM could also trigger  
337 reorganization of lipid nano-domains to modulate signaling platforms<sup>14,46</sup>. Thus, our  
338 findings should open new avenues for understanding how *Mtb* subverts other receptors  
339 involved in its recognition by the immune system<sup>47</sup>, including Toll-like receptors, NOD-  
340 like receptors, and C-type lectin receptors.

341 Modulating the activity of membrane proteins will ultimately modulate cellular  
342 functions. Indeed, we showed that DIM promote *Mtb* infection (**Fig. 5**). To confirm the  
343 relevance of the conical shape, we showed that conical POPE lipids, but not cylindrical  
344 POPC lipids, added to macrophages also restored the infection capacity of a DIM-  
345 deficient *Mtb* mutant and improved phagocytosis (**Fig. 5**). Our results also shed new  
346 light on previous observations showing that a DIM-deficient *Mtb* mutant coated with  
347 tripalmitin lipid was less effective in infecting macrophages than DIM-coated mutants<sup>8</sup>.  
348 This can now be understood by the fact that tripalmitin did not promote formation of a  
349 non-bilayer phase transition in our model membranes (**Fig. 5**), hence did not display a  
350 strong conical shape. To our knowledge, our results demonstrate for the first time that  
351 the conical shape of a lipid promotes phagocytosis. The conical shape of DIM and their  
352 effect on disorganizing the membrane may also play a role in the induction of  
353 phagosomal membrane rupture and cell death<sup>48,49</sup>. Altogether, this new understanding  
354 of how the molecular shape of DIM lipids and their biophysical properties affect  
355 biological membranes may help to design host-directed therapeutic strategies to fight  
356 Tuberculosis<sup>50</sup> by preventing the infection of macrophages by *Mtb*.

357

358

359

## 360 **ACKNOWLEDGEMENTS**

361 This work was supported by the CNRS-MITI grants PEPS MPI 2018 and “Modélisation  
362 du vivant” 2019, Agence Nationale de la Recherche (grant ANR-16-CE15-0003), the  
363 Fondation pour la Recherche Médicale FRM (“Equipe FRM” number  
364 DEQ20160334879) and the Centre National de la Recherche Scientifique (CNRS).  
365 J.A. was a recipient of a PhD scholarship from the French government. This work was  
366 granted access to the HPC resources of CALMIP supercomputing center under the  
367 allocation 2019-17036. C.A.D. thanks TRI-Genotoul Imaging facility (Toulouse,  
368 France). We acknowledge Life Science Editors for proofreading the manuscript. We



369 thank Olivier Neyrolles, Jérôme Nigou, Laurence Salomé, and Justin Teissié for fruitful  
370 discussions and support.

371

## 372 REFERENCES

- 373 1. Jackson, M. The mycobacterial cell envelope-lipids. *Cold Spring Harb Perspect*  
374 *Med* **4**, (2014).
- 375 2. Forrellad, M. A. *et al.* Virulence factors of the Mycobacterium tuberculosis  
376 complex. *Virulence* **4**, 3–66 (2014).
- 377 3. Cox, J. S., Chen, B., McNeil, M. & Jacobs, W. R. Complex lipid determines  
378 tissue-specific replication of Mycobacterium tuberculosis in mice. *Nature* **402**,  
379 79–83 (1999).
- 380 4. Day, T. A. *et al.* Mycobacterium tuberculosis Strains Lacking Surface Lipid  
381 Phthiocerol Dimycocerosate Are Susceptible to Killing by an Early Innate Host  
382 Response. *Infect. Immun.* **82**, 5214–5222 (2014).
- 383 5. Howard, N. C. *et al.* Mycobacterium tuberculosis carrying a rifampicin drug  
384 resistance mutation reprograms macrophage metabolism through cell wall lipid  
385 changes. *Nature Microbiology* **2018 3:10 3**, 1099–1108 (2018).
- 386 6. Arbués, A., Lugo-Villarino, G., Neyrolles, O., Guilhot, C. & Astarie-Dequeker, C.  
387 Playing hide-and-seek with host macrophages through the use of mycobacterial  
388 cell envelope phthiocerol dimycocerosates and phenolic glycolipids. *Front Cell*  
389 *Infect Microbiol* **4**, 173 (2014).
- 390 7. Cambier, C. J. *et al.* Mycobacteria manipulate macrophage recruitment through  
391 coordinated use of membrane lipids. *Nature* **505**, 218–222 (2014).
- 392 8. Astarie-Dequeker, C. *et al.* Phthiocerol dimycocerosates of M. tuberculosis  
393 participate in macrophage invasion by inducing changes in the organization of  
394 plasma membrane lipids. *PLoS Pathog.* **5**, e1000289 (2009).
- 395 9. Astarie-Dequeker, C., Nigou, J., Passemar, C. & Guilhot, C. The role of  
396 mycobacterial lipids in host pathogenesis. *Drug Discovery Today: Disease*  
397 *Mechanisms* **7**, e33–e41 (2010).
- 398 10. Nitenberg, M. *et al.* The potent effect of mycolactone on lipid membranes. *PLoS*  
399 *Pathog.* **14**, e1006814 (2018).
- 400 11. Nakayama, H. *et al.* Lipoarabinomannan binding to lactosylceramide in lipid rafts  
401 is essential for the phagocytosis of mycobacteria by human neutrophils. *Sci*  
402 *Signal* **9**, ra101–ra101 (2016).
- 403 12. Harayama, T. & Riezman, H. Understanding the diversity of membrane lipid  
404 composition. *Nat. Rev. Mol. Cell Biol.* **19**, 281–296 (2018).
- 405 13. Frolov, V. A., Shnyrova, A. V. & Zimmerberg, J. Lipid Polymorphisms and  
406 Membrane Shape. *Cold Spring Harb Perspect Biol* **3**, a004747–a004747 (2011).
- 407 14. Vanni, S., Hirose, H., Barelli, H., Antonny, B. & Gautier, R. A sub-nanometre  
408 view of how membrane curvature and composition modulate lipid packing and  
409 protein recruitment. *Nat Commun* **5**, 4916 (2014).
- 410 15. Bassereau, P. *et al.* The 2018 biomembrane curvature and remodeling roadmap.  
411 *Journal of Physics D: Applied Physics* **51**, 343001 (2018).
- 412 16. Layre, E. *et al.* A comparative lipidomics platform for chemotaxonomic analysis  
413 of Mycobacterium tuberculosis. *Chemistry & Biology* **18**, 1537–1549 (2011).
- 414 17. Jain, M. *et al.* Lipidomics reveals control of Mycobacterium tuberculosis virulence  
415 lipids via metabolic coupling. *Proc. Natl. Acad. Sci. U.S.A.* **104**, 5133–5138  
416 (2007).

- 417 18. Sulzenbacher, G. *et al.* LppX is a lipoprotein required for the translocation of  
418 phthiocerol dimycocerosates to the surface of *Mycobacterium tuberculosis*.  
419 *EMBO J.* **25**, 1436–1444 (2006).
- 420 19. Marrink, S. J. & Tieleman, D. P. Perspective on the Martini model. *Chem Soc*  
421 *Rev* **42**, 6801–6822 (2013).
- 422 20. Ingólfsson, H. I., Arnarez, C., Periole, X. & Marrink, S. J. Computational  
423 ‘microscopy’ of cellular membranes. *J. Cell. Sci.* jcs.176040 (2016).  
424 doi:10.1242/jcs.176040
- 425 21. Khandelia, H., Duelund, L., Pakkanen, K. I. & Ipsen, J. H. Triglyceride Blisters in  
426 Lipid Bilayers: Implications for Lipid Droplet Biogenesis and the Mobile Lipid  
427 Signal in Cancer Cell Membranes. *PLoS ONE* **5**, e12811 (2010).
- 428 22. Ben M'barek, K. *et al.* ER Membrane Phospholipids and Surface Tension Control  
429 Cellular Lipid Droplet Formation. *Dev. Cell* **41**, 591–604.e7 (2017).
- 430 23. Seddon, J. M. Structure of the inverted hexagonal (HII) phase, and non-lamellar  
431 phase transitions of lipids. *Biochim. Biophys. Acta* **1031**, 1–69 (1990).
- 432 24. Separovic, F. & Gawrisch, K. Effect of unsaturation on the chain order of  
433 phosphatidylcholines in a dioleoylphosphatidylethanolamine matrix. *Biophys. J.*  
434 **71**, 274–282 (1996).
- 435 25. Fuller, N. & Rand, R. P. The Influence of Lysolipids on the Spontaneous  
436 Curvature and Bending Elasticity of Phospholipid Membranes. *Biophys. J.* **81**,  
437 243–254 (2001).
- 438 26. Edgar E Kooijman *et al.* Spontaneous Curvature of Phosphatidic Acid and  
439 Lysophosphatidic Acid. *Biochemistry* **44**, 2097–2102 (2005).
- 440 27. Marrink, S.-J. & Mark, A. E. Molecular view of hexagonal phase formation in  
441 phospholipid membranes. *Biophys. J.* **87**, 3894–3900 (2004).
- 442 28. Cullis, P. R. & De Kruijff, B. Lipid polymorphism and the functional roles of lipids  
443 in biological membranes. *Biochimica et Biophysica Acta (BBA) - Reviews on*  
444 *Biomembranes* **559**, 399–420 (1979).
- 445 29. Yeagle, P. L., Smith, F. T., Young, J. E. & Flanagan, T. D. Inhibition of membrane  
446 fusion by lysophosphatidylcholine. *Biochemistry* **33**, 1820–1827 (1994).
- 447 30. Marrink, S. J. & Mark, A. E. The mechanism of vesicle fusion as revealed by  
448 molecular dynamics simulations. *J. Am. Chem. Soc.* **125**, 11144–11145 (2003).
- 449 31. TILCOCK, C. & Cullis, P. R. The Polymorphic Phase-Behavior and Miscibility  
450 Properties of Synthetic Phosphatidylethanolamines. *Biochim. Biophys. Acta* **684**,  
451 212–218 (1982).
- 452 32. Le Cabec, V., Cols, C. & Maridonneau-Parini, I. Nonopsonic phagocytosis of  
453 zymosan and *Mycobacterium kansasii* by CR3 (CD11b/CD18) involves distinct  
454 molecular determinants and is or is not coupled with NADPH oxidase activation.  
455 *Infect. Immun.* **68**, 4736–4745 (2000).
- 456 33. Rhoades, E. *et al.* Identification and macrophage-activating activity of glycolipids  
457 released from intracellular *Mycobacterium bovis* BCG. *Mol. Microbiol.* **48**, 875–  
458 888 (2003).
- 459 34. Crowley, J. T. *et al.* Lipid exchange between *Borrelia burgdorferi* and host cells.  
460 *PLoS Pathog.* **9**, e1003109 (2013).
- 461 35. Brown, L., Wolf, J. M., Prados-Rosales, R. & Casadevall, A. Through the wall:  
462 extracellular vesicles in Gram-positive bacteria, mycobacteria and fungi. *Nat Rev*  
463 *Micro* **13**, 620–630 (2015).
- 464 36. Bomberger, J. M. *et al.* Long-Distance Delivery of Bacterial Virulence Factors by  
465 *Pseudomonas aeruginosa* Outer Membrane Vesicles. *PLoS Pathog.* **5**,  
466 e1000382 (2009).

- 467 37. Chernomordik, L. V. & Kozlov, M. M. Mechanics of membrane fusion. *Nat. Struct.*  
468 *Mol. Biol.* **15**, 675–683 (2008).
- 469 38. Zick, M., Stroupe, C., Orr, A., Douville, D. & Wickner, W. T. Membranes linked  
470 by trans-SNARE complexes require lipids prone to non-bilayer structure for  
471 progression to fusion. *Elife* **3**, e01879 (2014).
- 472 39. daCosta, C. J. B., Dey, L., Therien, J. P. D. & Baenziger, J. E. A distinct  
473 mechanism for activating uncoupled nicotinic acetylcholine receptors. *Nat.*  
474 *Chem. Biol.* **9**, 701–707 (2013).
- 475 40. Pliotas, C. *et al.* The role of lipids in mechanosensation. *Nat. Struct. Mol. Biol.*  
476 **22**, 991–998 (2015).
- 477 41. Hresko, R. C., Kraft, T. E., Quigley, A., Carpenter, E. P. & Hruz, P. W.  
478 Mammalian Glucose Transporter Activity Is Dependent upon Anionic and  
479 Conical Phospholipids. *J. Biol. Chem.* **291**, 17271–17282 (2016).
- 480 42. Speert, D. P. & Silverstein, S. C. Phagocytosis of Unopsonized Zymosan by  
481 Human Monocyte-Derived Macrophages: Maturation and Inhibition by Mannan.  
482 *Journal of Leukocyte Biology* **38**, 655–658 (1985).
- 483 43. Rosholm, K. R. *et al.* Membrane curvature regulates ligand-specific membrane  
484 sorting of GPCRs in living cells. *Nat. Chem. Biol.* **13**, 724–729 (2017).
- 485 44. Aimon, S. *et al.* Membrane shape modulates transmembrane protein  
486 distribution. *Dev. Cell* **28**, 212–218 (2014).
- 487 45. Hamilton, P. J. *et al.* PIP<sub>2</sub> regulates psychostimulant behaviors  
488 through its interaction with a membrane protein. *Nat. Chem. Biol.* **10**, 582–589  
489 (2014).
- 490 46. Hirama, T. *et al.* Membrane curvature induced by proximity of anionic  
491 phospholipids can initiate endocytosis. *Nat Commun* **8**, 1393 (2017).
- 492 47. Liu, C. H., Liu, H. & Ge, B. Innate immunity in tuberculosis: host defense vs  
493 pathogen evasion. *Cellular & Molecular Immunology* 2017 14:12 **14**, 963–975  
494 (2017).
- 495 48. Augenstreich, J. *et al.* ESX-1 and phthiocerol dimycocerosates of  
496 Mycobacterium tuberculosis act in concert to cause phagosomal rupture and  
497 host cell apoptosis. *Cellular Microbiology* **19**, e12726 (2017).
- 498 49. Quigley, J. *et al.* The Cell Wall Lipid PDIM Contributes to Phagosomal Escape  
499 and Host Cell Exit of Mycobacterium tuberculosis. *MBio* **8**, (2017).
- 500 50. Guler, R. & Brombacher, F. Host-directed drug therapy for tuberculosis. *Nat.*  
501 *Chem. Biol.* **11**, 748–751 (2015).

502  
503  
504  
505

## METHODS

506

### Antibodies, lipids and reagents

508 The rabbit polyclonal antibody against mycobacteria was produced as previously  
509 described<sup>8</sup>. The Rhodamine Red-conjugated goat anti-rabbit secondary antibody and  
510 Wheat Germ Agglutinin (WGA), Alexa Fluor<sup>®</sup> 350 conjugate were purchased from  
511 Invitrogen. DIM were extracted from *Mycobacterium canetti* as described below. 1-  
512 palmitoyl-2-oleoyl-*sn*-glycero-3-phosphocholine (16:0-18:1 PC, POPC), 1-palmitoyl-2-

513 oleoyl-*sn*-glycero-3-phosphoethanolamine (16:0-18:1 PE, POPE), 1-stearoyl-2-oleoyl-  
514 *sn*-glycero-3-phosphocholine (18:0-18:1 PC, SOPC), 1,2-dioleoyl-*sn*-glycero-3-  
515 phosphoethanolamine (18:1-18:1 PE, DOPE), 1-palmitoyl-2-hydroxy-*sn*-glycero-3-  
516 phosphocholine (16:0 lysoPC) and 1,2-dilinoleoyl-*sn*-glycero-3-phosphoethanolamine  
517 (18:2 PE, DLiPE) were purchased from Avanti Polar Lipids (Alabaster, AL, USA).  
518 Tripalmitin was a generous gift from M. Tropis (Toulouse, France). The other reagents  
519 were purchased from Sigma-Aldrich, except when specifically mentioned.

520

## 521 **Bacterial strains and growth conditions**

522 The strains used in this study included the wild-type (WT) *M. tuberculosis* strain,  
523 H37Rv Pasteur (the sequenced strain from Institut Pasteur, Paris) and two distinct  
524 H37Rv mutants. The *ppsE* mutant (H37Rv $\Delta$ *ppsE*) was constructed in a previous study  
525 by insertion/deletion within the polyketide synthase gene *ppsE*<sup>51</sup> required for the  
526 synthesis of DIM. The WT strain and the H37Rv $\Delta$ *ppsE* mutant were rendered  
527 fluorescent by the transfer of plasmid pMV361H *gfp*<sup>8</sup>. The *lppX* mutant (H37Rv  $\Delta$ *lppX*)  
528 was constructed by homologous recombination using the thermosensitive  
529 counterselectable plasmid pPR27 as previously described<sup>52</sup>. Briefly, a 2.6kb DNA  
530 fragment covering the *lppX* gene was amplified by PCR from H37Rv genomic DNA  
531 using primers *lppXA* (5'-GCTCTAGAGTTTAAACGCATTTGAGCAGCCGAG-3') and  
532 *lppXB* (5'-GCTCTAGAGTTTAAACGAAGAATACCTGGCCGC-3') and inserted into a  
533 cloning vector. The *res- $\Omega$ km-res* cassette (Malaga et al., 2003) was inserted at the  
534 unique KpnI site within the *lppX* gene to generate the allelic exchange substrate (AES)  
535 formed of the *res- $\Omega$ km-res* cassette flanked by two arms (of approximately 1kb)  
536 specific to *lppX*. This AES was recovered on a PmeI restriction fragment and inserted  
537 into the XbaI site of pPR27. The resulting plasmid was transferred into the recipient *M.*  
538 *tuberculosis* H37Rv strain and allelic exchange mutants were selected as described  
539 previously<sup>52</sup>. Kanamycin and sucrose resistant clones were analyzed by PCR using  
540 primers *lppXC* (5'-CAAACGCGTTTCTGGACGG-3'), *lppXD* (5'-  
541 GGCAATCCACACGGTCGC-3'), *lppXE* (5'-GAGCATTGAAAGCTCCCACC-3')  
542 specific of the *M. tuberculosis* H37Rv genome, and *res1* (5'-  
543 GCTCTAGAGCAACCGTCCGAAATATTATAAA-3') and *res2* (5'-  
544 GCTCTAGATCTCATAAAAATGTATCCTAAATCAAATATC-3') specific of the *res-*

545 *Ωkm-res* cassette. One clone giving the pattern corresponding to the allelic exchange  
546 was retained for analysis and named H37Rv  $\Delta ppX$  (or *PMM76*).

547 All strains were cultured at 37°C in Middlebrook 7H9 liquid medium (BD  
548 Difco) containing 10% albumin-dextrose-catalase (ADC) (BD Difco). When required,  
549 kanamycin, hygromycin and Tween-80 were added to the medium to a final  
550 concentration of 40  $\mu\text{g mL}^{-1}$ , 50  $\mu\text{g mL}^{-1}$  and 0.05% (v/v) respectively.

551

### 552 **Purification of DIM and preparation of lipid solutions**

553 DIM were purified from *M. canetti* as previously described<sup>53</sup>. Briefly, total mycobacterial  
554 lipids were extracted from stationary cultures of *M. canetti*. The bacteria were left  
555 successively in  $\text{CH}_3\text{OH}/\text{CHCl}_3$  (2:1, vol/vol) for 48 h and in  $\text{CH}_3\text{OH}/\text{CHCl}_3$  (1:2, vol/vol)  
556 for 24 h. The organic phase was recovered, washed with water and dried. Total lipids  
557 were then resuspended in  $\text{CHCl}_3$  and the chromatographic separation of DIM was run  
558 manually using Sep-Pak Silica Classic Cartridges (55-105  $\mu\text{m}$  particle size; Waters)  
559 and an elution gradient of an increasing concentration of diethylether (0-10% (v/v)) in  
560 petroleum ether. Fractions containing the isolated compounds were pooled and dried.  
561 Stock solutions of purified DIM (40 mg/mL), POPE (20 mg/mL) and POPC (21 mg/mL)  
562 were prepared by dissolving the dried lipids in  $\text{CH}_3\text{OH}/\text{CHCl}_3$  (2:1, vol/vol). The  
563 solutions were then injected in serum-free RPMI 1640 medium (Gibco) at the final  
564 concentration of 70  $\mu\text{M}$  (1/400 dilution) and sonicated at 37°C until complete dispersion  
565 of the lipids.

566

### 567 **Macrophage culture**

568 The human promonocytic cell line THP-1 (ECACC 88081201; Salisbury, UK) was  
569 cultured in RPMI 1640 medium containing 10% heat-inactivated fetal bovine serum  
570 (FBS), 2 mM L-Glutamine, 1 mM sodium pyruvate, and 1% MEM non-essential amino  
571 acids. For macrophage differentiation, the THP-1 cells were washed and suspended  
572 in medium containing 10% FBS. The cells were distributed in a glass petri dish at a  
573 density of  $3 \times 10^6$  cells/petri dish and were differentiated into macrophages with 30 nM  
574 phorbol 12-myristate 13-acetate (PMA) for 3 days. Before use, the cells were washed  
575 twice with fresh medium.

576 Human blood purchased from the Etablissement Français du Sang in Toulouse  
577 (France) was collected from fully anonymous non-tuberculous donors. Human  
578 macrophages derived from monocytes (hMDMs) were prepared as previously

579 described<sup>8</sup>. Briefly, monocytes were isolated from peripheral blood mononuclear cells  
580 (PBMC) by adhesion on a glass coverslip in 24-well tissue culture plates. Monocytes  
581 ( $5 \times 10^5$  cells/well) were differentiated into hMDMs in RPMI 1640 (Gibco),  
582 supplemented with 2 mM glutamine (Gibco) and 7% (v/v) heat-inactivated human AB  
583 serum for 7 days.

584

### 585 **Macrophage infection**

586 Single cell suspensions were prepared with exponentially growing strains as previously  
587 described<sup>8</sup>. Briefly, the bacteria were grown to mid-exponential growth phase on  
588 Middlebrook 7H9 liquid medium supplemented with 10% ADC, and were then pelleted  
589 by centrifugation and dispersed in serum-free RPMI 1640 medium using glass beads.  
590 The number of bacteria per mL in the suspension was estimated by measurement of  
591 the optical density at 600 nm. The bacteria were added to the macrophages at the  
592 indicated multiplicity of infection (MOI) and incubated for 1-2 h at 37°C in an  
593 atmosphere containing 5% CO<sub>2</sub>. Extracellular bacteria or particles were removed by  
594 three successive washes with fresh medium.

595

### 596 **Assay for monitoring DIM transfer to macrophage membranes**

597 For experiments with purified DIM, THP-1 cells were incubated with RPMI 1640  
598 medium supplemented with 70 μM DIM at 37 °C and 5% CO<sub>2</sub>. After 1 h, the cells were  
599 rinsed with fresh medium and detached by incubation with a 0.05% trypsin-EDTA  
600 solution (Gibco) for 15 min. The cells were then harvested, centrifuged at 150 x g for  
601 10 min and the cell pellet was suspended in RPMI 1640 medium (A).

602 For experiments with DIM in the context of the *M. tuberculosis* cell envelope, THP-1  
603 cells were incubated with H37Rv WT or H37Rv ΔLppX (MOI 15:1), washed with fresh  
604 RPMI-1640 medium, and further incubated in the presence of serum at 37°C and 5%  
605 CO<sub>2</sub>. After 40 h, the cells were rinsed with RPMI-1640 medium, detached  
606 enzymatically with trypsin and centrifuged at 150 x g for 10 min. The membranes were  
607 prepared using a protocol adapted from Rhoades *et al.*<sup>33</sup>. The pellet was suspended  
608 in 1 mL ice-cold homogenization buffer (1 mM EDTA, 20 mM HEPES, pH 7) containing  
609 250 mM sucrose and the cells were disrupted by 25 passages through a 26-gauge  
610 needle. Following centrifugation at 3000 x g for 10 min at 4°C in order to sediment  
611 nuclei and large cell debris, the supernatant was recovered. This step was repeated  
612 twice. The supernatant was layered onto a linear gradient of 30% to 12% sucrose and

613 centrifuged at 2,000 x g for 1 h at 4°C. The upper portion of the gradient containing the  
614 membrane fraction was isolated, layered on a discontinuous gradient of 50% to 25%  
615 sucrose, and centrifuged at 2,000 x g for 30 min at 4°C. The fraction above the 25%  
616 portion containing the membrane fraction was isolated, centrifuged at 110,000 x g for  
617 1 h at 4°C and the membrane pellet was taken up in homogenization buffer (B).  
618 Total lipids were extracted from the macrophage membranes using the Bligh and Dyer  
619 extraction protocol<sup>54</sup>. Briefly, to one volume of cells suspension (A) or membrane  
620 fraction (B), 2.5 volumes of CH<sub>3</sub>OH and 1.25 volumes of CHCl<sub>3</sub> were added. The  
621 mixture was incubated at room temperature for 48 h. Then, 1.25 volumes of CHCl<sub>3</sub>  
622 followed by 1.25 volumes of CHCl<sub>3</sub> were added. This mixture was left standing for 24 h  
623 to separate the organic and aqueous phases. Twenty-four hours later, the organic  
624 phase containing the lipids was recovered and dried under a stream of nitrogen. For  
625 the membrane fraction samples, the DIM were purified from the total lipid extract by  
626 column chromatography using a Florisil column. The Florisil was equilibrated with a  
627 solution of petroleum ether/diethyl ether (98:2, v/v). The total lipid extract was dissolved  
628 in this solution and DIM were eluted with the same solution.

629

### 630 **Lipid analysis by MALDI-TOF MS analysis**

631 DIM were analyzed by matrix-assisted laser desorption-ionization time-of-flight  
632 (MALDI-TOF) mass spectrometry, as described previously<sup>55</sup>. Lipid residues were  
633 dissolved in 20 µL of CHCl<sub>3</sub>, deposited on the analysis plate and dried. Then, 0.5 µL  
634 of 2,5-dihydroxybenzoic acid (10 mg/mL) dissolved in CHCl<sub>3</sub>/CH<sub>3</sub>OH (1:1, vol:vol) were  
635 deposited on the sample and allowed to crystallize at room temperature. Mass spectra  
636 were acquired with a MALDI TOF/TOF 5800 analyzer (Applied Biosystems/AB SCIEX,  
637 Framingham, MA, USA) equipped with an Nd:YAG laser (Wavelength 349 nm; pulse  
638 rate 400 Hz). The acquisition was carried out in continuous scan mode, in positive  
639 mode with a laser intensity of 3500 (arbitrary unit of the software). The final spectrum  
640 was obtained by accumulating 10 spectra of 250 laser shots.

641

### 642 **Phagocytosis assay**

643 Phagocytosis was assessed as described previously<sup>8</sup>. Briefly, human monocyte-  
644 derived macrophages (hMDM) cultured on sterile glass coverslips in 24-well culture  
645 plates were infected with GFP-expressing bacteria (MOI 10:1) or zymosan (MOI 30:1)  
646 for 1 h. When indicated, the hMDM were pre-treated for 1 h with 70 µM lipids or 1/400

647 lipid solvent (CH<sub>3</sub>OH/CHCl<sub>3</sub> (2:1, vol/vol) prepared in RPMI as for lipid suspension). At  
648 the end of infection, the hMDM were intensively washed and fixed with 4% (w/v) PFA.  
649 For mycobacteria, extracellular GFP-bacilli were labelled with rabbit anti-mycobacteria  
650 Ab revealed by a Rhodamine Red-conjugated goat anti-rabbit secondary Ab. The cells  
651 were then permeabilized with 0.3% Triton X-100 for 5 min and stained for 15 min with  
652 WGA conjugated to Alexa Fluor<sup>®</sup> 350 to visualize the hMDM. For zymosan, hMDMs  
653 were labelled with TRITC-phalloidin and extracellular zymosan was readily  
654 distinguished from internalized particles, which appeared as yellowish grains within a  
655 dark phagosome bordered by diffuse red staining. The percentage of cells having  
656 ingested at least one bacterium or zymosan particle was determined by fluorescence  
657 microscopy using a Leica 43 DM-RB epifluorescence microscope. For each set of  
658 conditions, the experiments were performed in duplicate and at least 200 cells were  
659 counted per slide. Data are presented as the mean ± standard error of the mean (SEM)  
660 of the indicated number of experiments (n). Data were analyzed by the Wilcoxon  
661 signed-rank test using GraphPad PRISM (GraphPad Software, GPW5-078069-  
662 NBH9780) and p < 0.05 was used as the limit of statistical significance.

663

#### 664 **Formation of multilamellar vesicles for HRMAS NMR experiments**

665 To form multilamellar vesicles (MLV) of well-defined lipid compositions, we mixed  
666 appropriate volumes of chloroformic stock solutions of the different lipids in glass  
667 tubes. The chloroform was evaporated using a rotating evaporator. We inclined the  
668 tubes in the evaporator, resulting in the formation of a thin lipid film over a large area  
669 of the tube. The lipids were further dried under vacuum for ~2 h to remove any  
670 remaining traces of the solvent. Next, we added sufficient Tris buffer (10 mM Tris,  
671 1 mM EDTA, pH 7.4) to the tubes to cover the lipid film. The lipids were left to hydrate  
672 at a temperature chosen to favor the formation of the lamellar phase of the liposome  
673 membranes (see below for further details). We then vortexed each tube 6 × 30 s. After  
674 vortexing, we obtained a cloudy suspension of liposomes. We transferred the liposome  
675 suspensions to 1.5 mL centrifuge tubes and centrifuged the tubes for 15 min at  
676 16000 g, then stored them at 4°C. Before each NMR experiment, we removed the  
677 supernatant and transferred 50 µL of the liposome pellet to a 4 mm MAS rotor, taking  
678 care not to warm the liposomes. Before introducing the rotor into the NMR  
679 spectrometer, we equilibrated the temperature to ~5°C.



680 In order to be sure to prepare the membranes in the lamellar phase, we adapted the  
681 temperature of hydration to the lipid composition. Pure DOPE has a lamellar-to-  
682 inverted-hexagonal transition temperature of 10°C. Accordingly, we hydrated the  
683 samples of DOPE, DOPE/SOPC (9:1) and DOPE/SOPC (5:1) for 15 min on ice. We  
684 vortexed the lipids 6 × 30 s (with cooling on ice for at least 30 s between vortexing  
685 periods) in order to prepare and conserve the liposomes in the lamellar phase.  
686 DOPE/SOPC (3:1), DOPE/SOPC (1:1) and pure SOPC (which do not form a H<sub>II</sub> phase  
687 at 30°C) were incubated at 30°C in a water bath and vortexed 6 × 30 s with return to  
688 the water bath.

689 Incorporating the highly hydrophobic lipid DIM into liposomes requires incubating the  
690 lipids at higher temperature, but this would have favored the formation of the inverted-  
691 hexagonal phase for some membrane compositions. We therefore adapted our  
692 protocol for DIM-containing liposomes and their controls without DIM. For these lipid  
693 mixtures, we hydrated the lipids at 37°C on a shaker overnight. We then transferred  
694 the tubes to a water bath set at 37°C. The tubes were vortexed for 6 × 30 s, with return  
695 to the water bath between vortexing periods. All liposomes with compositions  
696 DOPE/SOPC (3:1) +/- DIM, DOPE/SOPC (3:1) +/- TAG and DOPE/SOPC/lysoPC  
697 (75:20:5) +/- DIM were prepared according to this protocol. We checked the correct  
698 incorporation of DIM in the liposomes using thin-layer chromatography on a few µL of  
699 the liposome suspension. We also conducted a separate <sup>1</sup>H-NMR experiment to  
700 quantify the incorporation of DIM in liposomes using our protocol (see Supplementary  
701 Material and Figures).

702

### 703 **NMR data acquisition**

704 Phosphorus NMR spectra were acquired on a 500 MHz Bruker Avance spectrometer,  
705 in a HRMAS probe, with deuterium lock. The lipid samples (typically 6 mg total lipids  
706 in 50 µL of Tris buffer (10 mM Tris, 1 mM EDTA, pH 7.4) were inserted into 4 mm rotors  
707 with spherical inserts. The temperature of the sample could be varied between 278 K  
708 and 324 K and was controlled to ± 0.1 K with a Bruker variable temperature unit. The  
709 temperature was calibrated using the known temperature dependence of methanol  
710 chemical shifts. <sup>31</sup>P chemical shift anisotropies (CSA) were determined from the  
711 spinning sideband manifolds at a spinning frequency of 2000 ± 1 Hz. MAS spectra  
712 were obtained with a spin-echo sequence ( $\pi/2 - \tau - \pi$ ) where the  $\pi/2$  pulse had a length  
713 of 5.3 µs (at a power of 107 W), applied at the lipids' isotropic resonance frequency,

714 and the interpulse delay,  $\tau$ , was 20  $\mu$ s. The dwell time was 1  $\mu$ s, the acquisition time  
715 65 ms, the relaxation delay 1 s and the number of scans 4096. No proton decoupling  
716 was applied during acquisition, since it was shown to have no effect on the linewidth  
717 at a 2 kHz spinning frequency (i.e. well above the  $^1\text{H}$ - $^{31}\text{P}$  dipolar coupling of  $\sim 500$  Hz  
718 in fluid lipid bilayers). For every sample, a  $^1\text{H}$  NMR spectrum at a spinning frequency  
719 of 10 kHz was acquired in order to calibrate the  $^1\text{H}$  (using the methylene peak at 1.25  
720 ppm with respect to TMS) and  $^{31}\text{P}$  chemical shifts (with respect to phosphoric acid at  
721 0 ppm, using  $\gamma_{\text{P}}/\gamma_{\text{H}} = 0.40480742$ ). The observed  $^{31}\text{P}$  isotropic chemical shifts were  
722  $-1.00 \pm 0.02$  ppm for the phosphatidylcholine head group (in SOPC) and  $-0.27 \pm 0.02$   
723 ppm for the phosphatidylethanolamine head group (in DOPE) and varied only slightly  
724 with the lipid compositions explored. Typical linewidths were 40-60 Hz (i.e.  $\sim 0.25$  ppm)  
725 so that the PC and PE sideband patterns were well resolved and could be fitted  
726 independently.

727 Every liposome sample was equilibrated overnight at 277 K before NMR  
728 measurements. We then measured its  $^{31}\text{P}$  MAS spectrum at temperatures from 284 K  
729 to 324 K, in 2 K increments every 100 min (25 min equilibration plus 75 min acquisition  
730 time for each temperature). For lipid mixtures which did not undergo a lamellar to  
731 inverse-hexagonal phase transition (i.e. with a small proportion of DOPE) the spectra  
732 were shown to be fully reversible when going down from 324 K to 284 K. However,  
733 once the  $\text{H}_{\text{II}}$  phase had formed, it did not revert to the lamellar phase, at least after one  
734 day of equilibration at 284 K. Hence, all measurements were done for increasing  
735 temperatures, starting from the lowest temperature, taking care of maintaining the  
736 liposomes at low temperature during their preparation and before NMR  
737 measurements. The actual insertion yield of DIM in the lipid bilayers was determined  
738 by  $^1\text{H}$ -NMR (see Supplementary material).

739

#### 740 **Spectral deconvolution**

741 We analyzed each  $^{31}\text{P}$  spinning sideband manifold using the solid line shape analysis  
742 tool (SOLA) available in Topspin 3.5. CSA parameters were calculated using the  
743 Haeberlin convention for the anisotropy values  $\Delta\delta = \delta_{\parallel} - \delta_{\perp}$  as commonly done in the  
744 membrane literature and as explained before<sup>56</sup>. We estimated the uncertainty of  $\Delta\delta$   
745 values to be  $\pm 0.2$  ppm, based on several measurements and fitting performed on  
746 independent samples. We first determined the CSA parameters of lipids organized in

747 a single phase (e.g. SOPC for the lamellar  $L_{\alpha}$  phase and DOPE for the  $H_{II}$  phase), at  
748 several temperatures between 284 K and 324 K. The CSA parameters for each lipid  
749 and each phase varied slightly and linearly with temperature, due to increased motion  
750 at higher temperatures: from  $49.6 \pm 0.2$  ppm (293 K) to  $45.0 \pm 0.2$  ppm (333 K) for  
751 SOPC in the  $L_{\alpha}$  phase; from  $-22.2 \pm 0.2$  ppm (278 K) to  $-20.1 \pm 0.2$  ppm (333 K) for  
752 DOPE in the  $H_{II}$  phase. The following linear regressions were obtained:  $\Delta\delta = -0.0944$   
753  $T + 76.599$  for SOPC in the  $L_{\alpha}$  phase,  $\Delta\delta = -0.0409 T - 33.627$  for DOPE in the  $H_{II}$   
754 phase, where T is the temperature in Kelvin; these regressions were used to calculate  
755 CSA values at intermediate temperatures. Since the lipids in the  $H_{II}$  phase experience  
756 additional motional averaging due to lateral diffusion around the aqueous channels,  
757 their CSA is obtained by averaging two components  $\delta_{//}$  and  $\delta_{\perp}$ , divided by two, for  
758 reasons discussed by Cullis and De Kruijff<sup>57</sup>. The CSA values in the  $L_{\alpha}$  and  $H_{II}$  phases  
759 have opposite signs. Hence, the CSA value of SOPC in the  $H_{II}$  phase was taken to be  
760  $-0.5$  times its value in the  $L_{\alpha}$  phase, while the CSA value of DOPE in the  $L_{\alpha}$  phase was  
761  $2$  times its value in the  $H_{II}$  phase. Knowing the temperature-dependent CSA  
762 parameters for both lipids in both phases allowed a drastic reduction of the number of  
763 parameters to be fitted when analyzing lipid mixtures in which the two phases coexist.  
764 After optimizing the peak positions and linewidths, the SOLA fitting algorithm only has  
765 to search for the  $L_{\alpha}$ - $H_{II}$  proportions that best reproduce the experimental spectra. The  
766 intensity of the spinning sideband at +4 kHz is a good reporter of the proportion of  $L_{\alpha}$   
767 phase, since this peak is almost absent from the typical  $H_{II}$  phase spinning sideband  
768 manifold<sup>58</sup> (see Fig. 4c). This fitting protocol was very robust and prevented the  
769 artefacts and instabilities arising from fitting too many parameters. We should stress  
770 that our procedure is based on the assumption that the spectra consist of a linear  
771 combination of the spectra of the two lipids in the  $L_{\alpha}$  and  $H_{II}$  phases, possessing CSA  
772 parameters identical to their values in the pure phases at the same temperature. This  
773 simplifying assumption was sufficient to characterize the lipid phase transitions,  
774 although we cannot exclude that the actual lipid behavior is more complex.

775

## 776 **Quantum mechanics**

777 To calculate partial charges for DIM lipid, a molecular dynamics simulation was first  
778 performed for 40 ns in the NPT ensemble. Lipid14<sup>59</sup> and general AMBER force field  
779 (Gaff)<sup>60</sup> were used in order to describe bonded and non-bonded terms within the

780 AMBER program. From this trajectory, 30 structures were extracted based on the  
781 clustering method (*kclust* from the MMTSB Toolkit, <http://www.mmtsb.org>, with the  
782 radius of 2.5 Å). These structures were fully optimized at the HF/6-31G\* quantum  
783 chemical method using the Gaussian 09 suite of programs (<http://gaussian.com/>).  
784 Partial charges were then obtained using RESP method<sup>61</sup> (RESP-A1) implemented in  
785 the RED tools<sup>62</sup>. For each structure, partial charges were obtained by charge fitting  
786 to the electrostatic potential at points selected according to the Merz-Singh-Kollman  
787 scheme<sup>63,64</sup> as proposed by the RESP-A1 method. Before charge calculations, a  
788 reorientation procedure was applied in order to maintain one ester (O=C-O) group in  
789 the same orientation for all 30 structures. Partial charges for the head groups of the  
790 DIM model are displayed in Figure S2.

791

792

### 793 **MD simulations**

794 The atomistic MD simulations were performed with the Amber16 software<sup>65</sup>  
795 (<http://ambermd.org>). The system contained a membrane of 300 POPC molecules and  
796 was solvated with TIP3P water model using the CHARMM-GUI server<sup>66,67</sup>. The DIM  
797 molecule was positioned in the POPC bilayer with the polar core in the proximity of the  
798 POPC oxygen atoms (see Fig. 2a). In order to avoid steric clashes of the DIM molecule  
799 with POPC, the system was initially minimized by executing 1500 iterations of the  
800 steepest descent (SD) algorithm, followed by 1500 iterations of the conjugate gradient  
801 (CG) algorithm, with weakly restrained solute ( $k = 10 \text{ kcal/mol/\AA}^2$ ). Next, a short 100  
802 ps MD run was performed on weakly restrained solute with temperature varying linearly  
803 from 0 to 303 K. The temperature control was achieved using the Langevin dynamics  
804 with the collision frequency parameter  $\gamma$  equal to  $1.0 \text{ ps}^{-1}$ . The integration step used in  
805 this run was 1 fs. Throughout the calculations a cutoff of 10 Å was used for electrostatic  
806 interactions. The MD simulation continued with the equilibration of the system,  
807 consisting of 10 consecutive MD steps of 500 ps each, at constant temperature of 303  
808 K with no restraints, with the integration step of 2 fs. The production run was then  
809 launched for 800 ns with constant pressure of 1 bar. The Langevin dynamics was used  
810 to control the temperature, with  $\gamma = 1.0 \text{ ps}^{-1}$ , while the pressure was controlled by the  
811 anisotropic Berendsen barostat with the pressure relaxation time  $\tau_p = 1 \text{ ps}$ . Bonds  
812 involving hydrogen were constrained with the SHAKE algorithm.

813 Coarse-grain simulations were performed using GROMACS 2016<sup>68</sup> with the MARTINI  
814 force field 2.2<sup>69,70</sup>. We have designed the CG model of DIM by following the original  
815 MARTINI parametrization strategy<sup>71</sup>. We approximated 3-4 heavy atoms constituting  
816 the long hydrophobic acyl chains by one C1 particle. Small methyl branched parts were  
817 approximated by a small particle SC1. The slightly polar extremity of the phthiocerol  
818 chain was approximated by a N<sub>0</sub> particle while the glycerol ester moieties were  
819 represented by an intermediate hydrophobicity particle Na as usually done for other  
820 phospholipids (see Fig. 2b). Force constants and equilibrium values for bonds and  
821 angles were extracted from the atomistic simulation (see Fig. S3). All the systems were  
822 first gradually equilibrated as proposed in the CHARMM-GUI MARTINI Maker  
823 protocol<sup>72</sup>). Coulomb interactions were treated using the reaction-field potential and  
824 Lennard–Jones interactions were treated using shifted potentials with a cut-off radius  
825 of 1.1 nm. For systems with a pure SOPC bilayer or DIM molecules embedded in  
826 POPC bilayer, pressure was maintained at 1 bar using the Parrinello-Rahman  
827 algorithm<sup>73</sup> with a semi-isotropic pressure control. The temperature was kept at 310 K  
828 using the v-rescale algorithm<sup>74</sup>. For pure DOPE and SOPC-DOPE systems undergoing  
829 lamellar to hexagonal transitions, we used the protocol described by S.J. Marrink and  
830 A. E. Mark<sup>27</sup>. We stacked 4 membranes of SOPC-DOPE mixture at a 3:1 ratio with a  
831 hydration level of approximately 2-3 water CG-particles per lipid (equivalent to c.a. 9-  
832 10 atomistic water molecules) in order to see the phase transition in a reasonable  
833 amount of time as detailed in S.J. Marrink and A. E. Mark paper<sup>27</sup>. A Berendsen  
834 thermostat in combination with a Berendsen barostat<sup>75</sup> were used. A fully anisotropic  
835 coupling pressure was applied with a reference pressure of 1 bar. Systems were  
836 equilibrated at 280K and then 8 different simulations were launched with temperatures  
837 ranging from 280K to 350K with an increment of 10K. In all CG systems, a time step  
838 of 20 fs was used. See Table S1 for a summary of the simulations. Parameters for CG  
839 and atomistic representations of DIM lipids will be available on the MARTINI website:  
840 [cgmartini.nl](http://cgmartini.nl). Density profiles were performed using the Gromacs tool density  
841 (<http://manual.gromacs.org/documentation/2016/onlinehelp/gmx-density.html>). MD  
842 simulations figures were performed using VMD<sup>76</sup>. Scripts used to analyze MD  
843 simulations will be available at: <https://github.com/MChavent>

844  
845  
846

847 **ADDITIONAL REFERENCES**

- 848 51. Simeone, R. *et al.* Molecular dissection of the biosynthetic relationship between  
849 phthiocerol and phthiodiolone dimycocerosates and their critical role in the  
850 virulence and permeability of *Mycobacterium tuberculosis*. *FEBS J.* **274**, 1957–  
851 1969 (2007).
- 852 52. Pelicic, V. *et al.* Efficient allelic exchange and transposon mutagenesis in  
853 *Mycobacterium tuberculosis*. *Proc. Natl. Acad. Sci. U.S.A.* **94**, 10955–10960  
854 (1997).
- 855 53. Arbués, A. *et al.* Trisaccharides of Phenolic Glycolipids Confer Advantages to  
856 Pathogenic *Mycobacteria* through Manipulation of Host-Cell Pattern-Recognition  
857 Receptors. *ACS Chem. Biol.* **11**, 2865–2875 (2016).
- 858 54. Bligh, E. G. & Dyer, W. J. A rapid method of total lipid extraction and purification.  
859 *Can J Biochem Physiol* **37**, 911–917 (1959).
- 860 55. Laval, F., Lanéelle, M. A., Déon, C., Monsarrat, B. & Daffé, M. Accurate  
861 molecular mass determination of mycolic acids by MALDI-TOF mass  
862 spectrometry. *Anal. Chem.* **73**, 4537–4544 (2001).
- 863 56. Holland, G. P., McIntyre, S. K. & Alam, T. M. Distinguishing individual lipid  
864 headgroup mobility and phase transitions in raft-forming lipid mixtures with 31P  
865 MAS NMR. *Biophys. J.* **90**, 4248–4260 (2006).
- 866 57. Cullis, P. R. & De Kruijff, B. Polymorphic phase behaviour of lipid mixtures as  
867 detected by 31P NMR. Evidence that cholesterol may destabilize bilayer  
868 structure in membrane systems containing phosphatidylethanolamine. *Biochim.*  
869 *Biophys. Acta* **507**, 207–218 (1978).
- 870 58. Moran, L. & Janes, N. Tracking Phospholipid Populations in Polymorphism by  
871 Sideband Analyses of 31P Magic Angle Spinning NMR. *Biophys. J.* **75**, 867–879  
872 (1998).
- 873 59. Dickson, C. J. *et al.* Lipid14: The Amber Lipid Force Field. *J. Chem. Theory*  
874 *Comput.* **10**, 865–879 (2014).
- 875 60. Wang, J., Wolf, R. M., Caldwell, J. W., Kollman, P. A. & Case, D. A. Development  
876 and testing of a general amber force field. *J Comput Chem* **25**, 1157–1174  
877 (2004).
- 878 61. Bayly, C. I., Cieplak, P., Cornell, W. & Kollman, P. A. A well-behaved  
879 electrostatic potential based method using charge restraints for deriving atomic  
880 charges: the RESP model. *The Journal of Physical Chemistry* **97**, 10269–10280  
881 (1993).
- 882 62. Dupradeau, F.-Y. *et al.* The R.E.D. tools: advances in RESP and ESP charge  
883 derivation and force field library building. *Phys Chem Chem Phys* **12**, 7821–7839  
884 (2010).
- 885 63. Singh, U. C. & Kollman, P. A. An approach to computing electrostatic charges  
886 for molecules. *J Comput Chem* **5**, 129–145 (1984).
- 887 64. Besler, B. H., Merz, K. M. & Kollman, P. A. Atomic charges derived from  
888 semiempirical methods. *J Comput Chem* **11**, 431–439 (1990).
- 889 65. Salomon Ferrer, R., Case, D. A. & Walker, R. C. An overview of the Amber  
890 biomolecular simulation package. *Wiley Interdisciplinary Reviews:*  
891 *Computational Molecular Science* **3**, 198–210 (2012).
- 892 66. Wu, E. L. *et al.* CHARMM-GUI Membrane Builder toward realistic biological  
893 membrane simulations. *J Comput Chem* **35**, 1997–2004 (2014).
- 894 67. Jo, S., Kim, T., Iyer, V. G. & Im, W. CHARMM-GUI: a web-based graphical user  
895 interface for CHARMM. *Journal of computational chemistry* **29**, 1859–1865  
896 (2008).

- 897 68. Abraham, M. J. *et al.* GROMACS: High performance molecular simulations  
898 through multi-level parallelism from laptops to supercomputers. *SoftwareX* **1-2**,  
899 19–25 (2015).
- 900 69. de Jong, D. H. *et al.* Improved Parameters for the Martini Coarse-Grained  
901 Protein Force Field. *J. Chem. Theory Comput.* **9**, 687–697 (2013).
- 902 70. Marrink, S. J., de Vries, A. H. & Mark, A. E. Coarse Grained Model for  
903 Semiquantitative Lipid Simulations. *J Phys Chem B* **108**, 750–760 (2004).
- 904 71. Marrink, S. J., Risselada, H. J., Yefimov, S., Tieleman, D. P. & de Vries, A. H.  
905 The MARTINI force field: coarse grained model for biomolecular simulations. *J*  
906 *Phys Chem B* **111**, 7812–7824 (2007).
- 907 72. Qi, Y. *et al.* CHARMM-GUI Martini Maker for Coarse-Grained Simulations with  
908 the Martini Force Field. *J. Chem. Theory Comput.* **11**, 4486–4494 (2015).
- 909 73. Parrinello, M. & Rahman, A. Polymorphic transitions in single crystals: A new  
910 molecular dynamics method. *J. Appl. Phys.* **52**, 7182 (1981).
- 911 74. Bussi, G., Donadio, D. & Parrinello, M. Canonical sampling through velocity  
912 rescaling. *J. Chem. Phys.* **126**, 014101 (2007).
- 913 75. Berendsen, H., Postma, J., Vangunsteren, W. F., DiNola, A. & Haak, J. R.  
914 Molecular-Dynamics with Coupling to an External Bath. *J. Chem. Phys.* **81**,  
915 3684–3690 (1984).
- 916 76. Humphrey, W., Dalke, A. & Schulten, K. VMD: visual molecular dynamics. *J Mol*  
917 *Graph* **14**, 33–8, 27–8 (1996).
